# Supplementary material for: Value of breast MRI omics features and clinical characteristics in Breast Imaging Reporting and Data System (BI-RADS) category 4 breast lesions: an analysis of radiomics-based diagnosis
Source: PubMed Central journal article supplement — Ann Transl Med. 2021 Nov;9(22):1677. doi: 10.21037/atm-21-5441 (PMC8667137; doi:10.21037/atm-21-5441), 2021-11
Supplement: atm-09-22-1677-dss.pdf [file atm-09-22-1677-dss.pdf]

## Data Sharing Statement

|                     |                                                                                                                                                     |                                                                                                                                 |
|---------------------|-----------------------------------------------------------------------------------------------------------------------------------------------------|---------------------------------------------------------------------------------------------------------------------------------|
| <b>Article Info</b> | <a href="https://dx.doi.org/10.21037/atm-21-5441">https://dx.doi.org/10.21037/atm-21-5441</a>                                                       |                                                                                                                                 |
| <b>Item</b>         | <b>Question</b>                                                                                                                                     | <b>Authors' Response<br/>(place "-" if not applicable)</b>                                                                      |
| 1                   | Would you like to share data collected for your study to others?                                                                                    | No.                                                                                                                             |
| 2                   | If not, would you like to share the reason for your decision?                                                                                       | Because the pictures and data in the article can give readers a lot of information, and the pictures are the original pictures. |
| 3                   | What data in particular will be shared?                                                                                                             | -                                                                                                                               |
| 4                   | Any other documents will be shared? Such as study protocol, statistical analysis plan, informed consent form, clinical study report, analytic code. | -                                                                                                                               |
| 5                   | When will data availability begin?                                                                                                                  | -                                                                                                                               |
| 6                   | When will data availability end?                                                                                                                    | -                                                                                                                               |
| 7                   | To whom will you share the data?                                                                                                                    | -                                                                                                                               |
| 8                   | For what type of analysis or purpose?                                                                                                               | -                                                                                                                               |
| 9                   | How or where can the data/documents be obtained?                                                                                                    | -                                                                                                                               |
| 10                  | Any other restrictions?                                                                                                                             | -                                                                                                                               |
